# Supplementary material
Source: Springer Nature journal article supplement (https://www.springermedizin.de/resource/supplementary/12875_2014_1090_MOESM2_ESM.pdf/9435798)

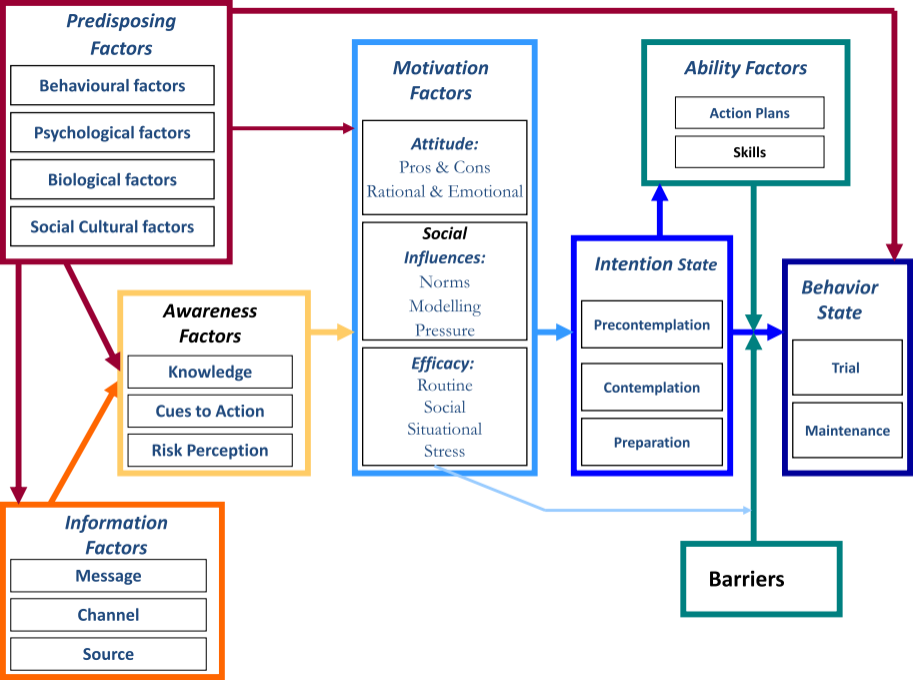

Supplement: MOESM2 [file 9435798]
